# Supplementary material for: Direct Z-scheme GaN/WSe2 heterostructure for enhanced photocatalytic water splitting under visible spectrum
Source: Royal Society of Chemistry journal article supplement (doi:10.1039/d3ra00928a), 2023-01-01
Supplement: d3ra00928a1.pdf [file d3ra00928a1.pdf]

## Supplementary material

### Direct Z-scheme GaN/WSe<sub>2</sub> heterostructure for enhanced photocatalytic water splitting under visible spectrum

‡ Xiaojun Ye, ‡<sup>a</sup> Fangfang Zhuang, <sup>a</sup> Yuhan Si, <sup>a</sup> Jingwen He, <sup>a</sup> Yifan Xue, <sup>a</sup> Hongbo Li, <sup>b</sup>  
Kai Wang, <sup>\*a</sup> Guoqiang Hao, <sup>\*a</sup> Rui Zhang

‡ Co-first authors: These authors contributed equally.

<sup>a</sup> School of Materials Science and Engineering, East China University of Science and  
Technology, Shanghai, 200237, China

<sup>b</sup> Shanghai Institute of Space Power-sources / State Key Laboratory of Space Power-  
sources Technology, Shanghai, 200245, China

\* Corresponding Authors: Guoqiang Hao: E-mail address: [haoguoqiang@ecust.edu.cn](mailto:haoguoqiang@ecust.edu.cn)  
Rui Zhang: E-mail address: [zhangrui118@ecust.edu.cn](mailto:zhangrui118@ecust.edu.cn)

## 1. Calculations of model VI of GaN/WSe<sub>2</sub> heterostructure with DET-TS.

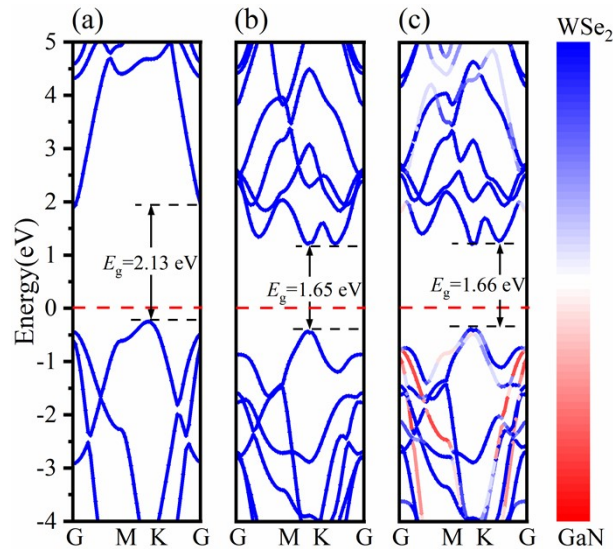

Fig. S1 Band structures of (a) isolated GaN, (b) isolated WSe<sub>2</sub>, (c) model VI of GaN/WSe<sub>2</sub> heterostructure.

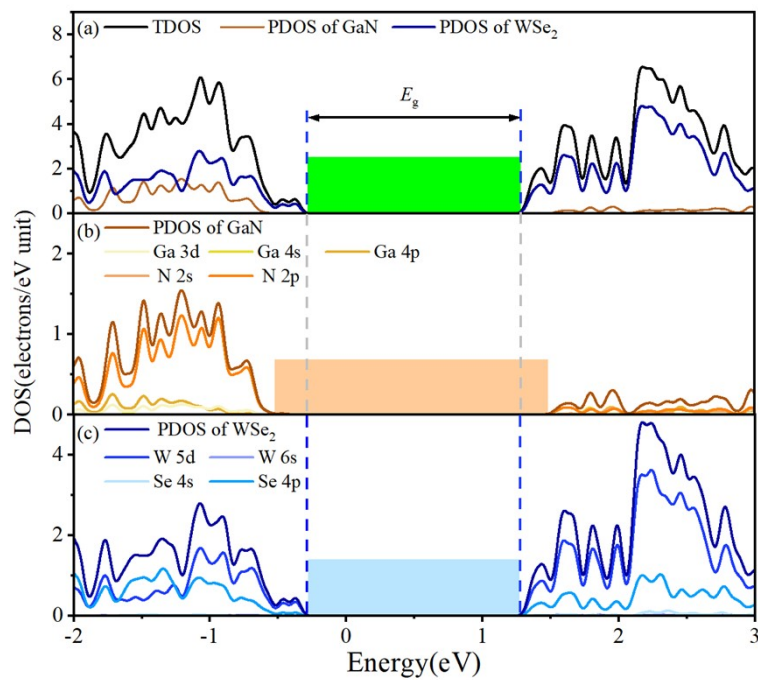

Fig. S2 (a) The calculated TDOS of GaN/WSe<sub>2</sub> heterostructure and PDOS of GaN and WSe<sub>2</sub> using DFT-TS functional. (b) The calculated PDOS of Ga, N atoms in GaN. (c) The calculated PDOS of W, Se atoms in WSe<sub>2</sub>.

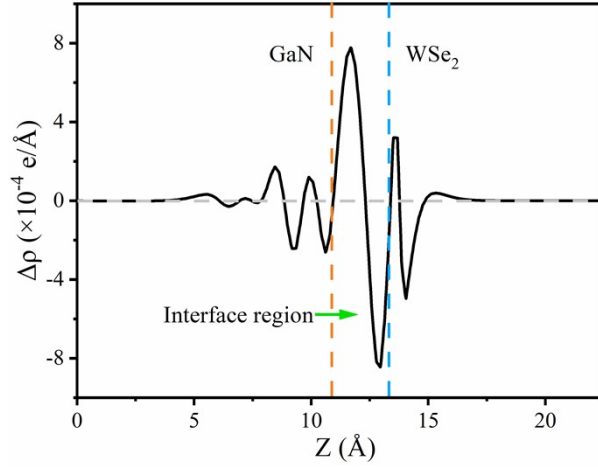

Fig. S3 Planar-averaged electron density difference  $\Delta\rho(z)$  for GaN/WSe<sub>2</sub> heterostructure.

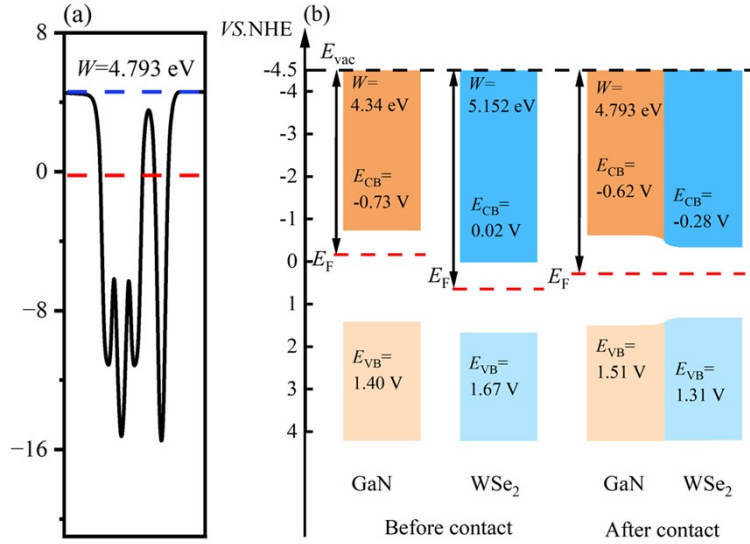

Fig. S4 Electrostatic potentials of (a) GaN/WSe<sub>2</sub> heterostructures of model VI. (b) Electronic energy band line-up diagrams for GaN and WSe<sub>2</sub> before contact, GaN and WSe<sub>2</sub> after contact in dark.

## 2. Definition of CB and VB edge potentials

The band edge energies of CB and VB of semiconductor are defined by the expression:

$$E_{CB} = \chi - E_0 - 0.5E_g \quad (S1)$$

$$E_{VB} = \chi - E_0 + 0.5E_g \quad (S2)$$

where  $\chi$  is the geometric mean of absolute electronegativity of atoms.  $E_0$  is the energy of free electron on the hydrogen scale (4.50 eV).  $E_c \sqrt{b^2 - 4ac}$  and  $E_v$  are the band edge energies of the CB and VB of semiconductor, respectively.  $E_g$  is the band gap of

semiconductors.

### 3. Calculations of carrier mobility

The carrier mobility can be calculated by the following formular [1]:

$$\mu_{2D} = \frac{eh^3 C_{2D}}{k_B T m^* m_d (E_1^i)^2} \quad (S3)$$

where  $e$  presents the electron charge,  $k_B$  presents the Boltzmann constant and  $h$  represents

the simplified Planck constant. The effective mass  $m^*$  is expressed as  $\frac{1}{m^*} = \frac{1}{\hbar^2} \frac{\partial^2 E(k)}{k^2}$ , where  $k$

represents the wave vector,  $E(k)$  is the dispersion relation corresponding to  $k$  near the Fermi

level. The temperature  $T$  is set to 300 K. The equivalent mass  $m_d$  is expressed as  $m_d = \sqrt{m_{zig}^* m_{arm}^*}$ ,

where  $m_{zig}^*$  and  $m_{arm}^*$  are the effective mass in the zigzag and armchair direction of the crystal,

respectively. The elastic modulus  $C_{2D}$  is given by  $C_{2D} = \frac{1}{S_0} \frac{\partial^2 E}{\partial \delta^2}$ , where  $E$  means the total energy

of the material,  $\delta$  is the strain and  $S_0$  is the surface area of the structure. The deformation

potential  $E_1^i$  is determined by  $E_1^i = \frac{\Delta V_i}{\Delta l / l_0}$ , where  $\Delta V_i$  is the energy change of the  $i^{\text{th}}$  band with

compressive and tensile strain,  $l_0$  is the lattice length along the transfer direction and  $\Delta l$  is the

variation of  $l_0$  ( $\Delta l / l_0$  is less than 0.5%).

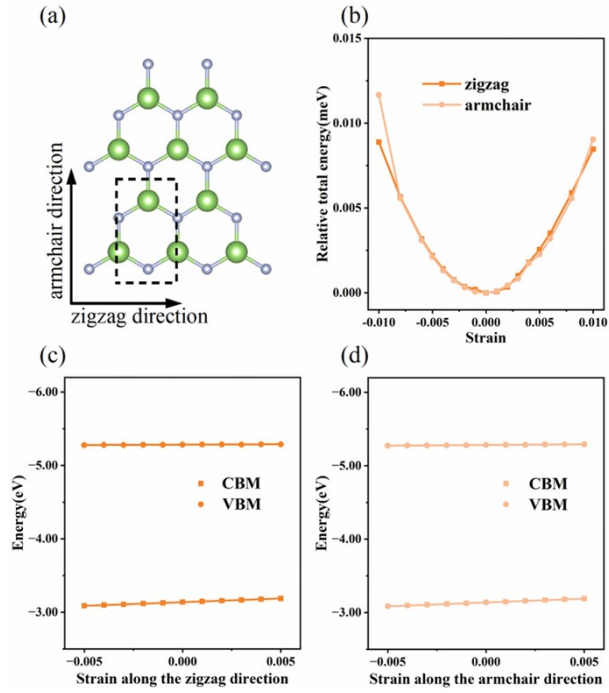

Fig. S5 (a) Top view of rectangular unit cell of GaN heterostructure. (b) The energy-strain relationship of GaN. The quadratic fitting of the data acquires the in-plane stiffness of GaN. The shift of CBM and VBM for GaN with reference to  $E_{vac}$  as a function of the utilized strain in the (c) zigzag and (d) armchair directions, respectively. The linear fitting provides the deformation potentials of GaN heterostructure.

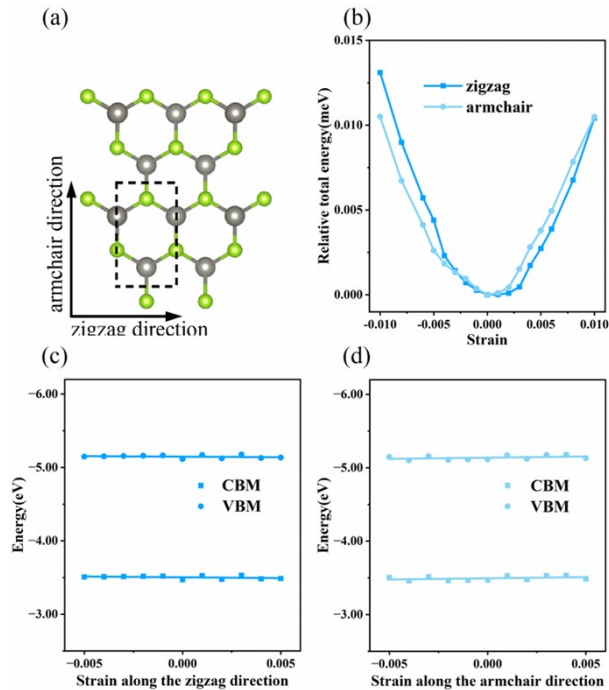

Fig. S6 (a) Top view of rectangular unit cell of WSe<sub>2</sub> heterostructure. (b) The energy-strain relationship of WSe<sub>2</sub>. The quadratic fitting of the data acquires the in-plane stiffness of WSe<sub>2</sub>. The shift of CBM and VBM for WSe<sub>2</sub> with reference to  $E_{vac}$  as a function of the utilized strain

in the (c) zigzag and (d) armchair directions, respectively. The linear fitting provides the deformation potentials of WSe<sub>2</sub> heterostructure.

#### 4. Calculations of Gibbs free energy

The Gibbs free energy can be expressed as follow [2]:

$$\Delta G = \Delta E + \Delta E_{\text{ZPE}} - T\Delta S + \Delta G_{\text{U}} + \Delta G_{\text{pH}} \quad (\text{S4})$$

where  $\Delta G$  presents the whole energy difference among the heterostructure and several terminations calculated by DFT-PBE method. The differences of zero-point energy and entropy between adsorbed states of intermediates and gap phases are represented as  $\Delta E_{\text{ZPE}}$  and  $T\Delta S$ , singly.  $T$  means the room temperature (298.15 K).  $\Delta G_{\text{U}} = -eU$ , whereby  $U$  expresses the electrode potential.  $\Delta G_{\text{pH}}$  was corrected to the solutions acidity and alkalinity.

#### References

- [1] S. Sun, F. Meng, H. Wang, H. Wang, Y. Ni, *J. Mater. Chem. A*, 2018, 6, 11890-11897.
- [2] J.K. Nørskov, J. Rossmeisl, A. Logadottir, L. Lindqvist, J.R. Kitchin, T. Bligaard, H. Jónsson, *J. Phys. Chem. B*, 2004, 108, 17886-17892.
